# Supplementary material for: Translation Initiation from Conserved Non-AUG Codons Provides Additional Layers of Regulation and Coding Capacity
Source: PubMed Central journal article supplement (PMC5487733; doi:10.1128/mbio.00844-17), 2017-06-27
Supplement: mbo003173356sf2.pdf [file mbo003173356sf2.pdf]

**A**

| Species name                   | uAUG1       | uAUG2       | mAUG       | NCC6       | NCC7       | NCC8        |
|--------------------------------|-------------|-------------|------------|------------|------------|-------------|
| Aciculosporium take            | GUCAAGAUGC  | AUCACCAUGG  | UUCAAGAUGA | GUUGAUUGG  | GCCAACAUU  | UUCACGACGG  |
| Ajellomyces capsulatus         | AAGAUAUUGG  | GUCACCAUGG  | UUGAAUUGG  | GGGCCUCUGA | ACAGCCAUU  | UUCACCAACGG |
| Ajellomyces dermatitidis       | CAAAUUUUGG  | GUCAACUUGG  | CGUAUUUUGU | GGAUUCUGA  | CCAAACAUGU | UUCACCAACGG |
| Alternaria arborescens         | CGAACAAUUGG | GUCAUCAUGG  | ACAAACUUGG |            |            | ACCAUCAACGG |
| Alternaria brassicicola        | CGAACAAUUGG | GUCAUCAUGG  | ACAAACUUGG |            |            | ACCAUCAACGG |
| Amorphotheca resiniae          | UCCAAGAUGU  | ACCACCAUGG  | CCCAACAUGG | GAAAACUGA  | GCCACAUAUC | UUCAACAACGG |
| Arthrotrichum oligospora       | GCCAAAUGG   | GCCAGGUAUGG | GUCGAUUGG  |            |            |             |
| Arthroderma benhaimiae         | UACAAGAUGG  | CCCAUCAUGG  | GCCGCAUUGG | GGACCUUGA  | ACCACCAUUC | UUCACCAACGG |
| Arthroderma gypseum            | UACAAGAUGG  | CCCAUCAUGG  | GCCGCAUUGG | GGACCUUGA  | ACCACCAUUC | UUCACCAACGG |
| Ascocoryne sarcoides           | GCCACGAUGU  | ACCAAGAUGG  | CCAAACUUGG | GAAUCUUGA  | GCCAACAUC  | UUCACCAACGG |
| Aspergillus clavatus           | UGCAAAAUGG  | GCAAUCAUGG  | CGCAUCAUGU | GGACCUUGA  | AACAUAUUC  | UUCACCAACGG |
| Aspergillus fumigatus          | UGCAAAAUGG  | GCAAUCAUGG  | CGCAUCAUGU | GGACCUUGA  | AACAUAUUC  | UUCACCAACGG |
| Aspergillus kawachii           | UUCAAAAUGG  | GCAAUCAUGG  | CGCAUCAUGU | GGACCUUGA  |            | UUCACCAACGG |
| Aspergillus nidulans           | CUCAAAAUGG  | GCAAUCAUGG  | CGCAUCAUGU | GAACCUUGA  |            | UUCACCAACGG |
| Aspergillus niger              | UUCAAAAUGG  | GCAAUCAUGG  | CGCAUCAUGU | GGACCUUGA  |            | UUCACCAACGG |
| Aspergillus oryzae             | UCCACAUGG   | GCAAUCAUGG  | CGCAUCAUGU | GGACCUUGA  | AACAUAUUC  | UUCACCAACGG |
| Aspergillus sojae              | UCCAAAUGG   | GCAAUCAUGG  | CGCAUCAUGU | GGACCUUGA  | AACAUAUUC  | UUCACCAACGG |
| Aspergillus terreus            | CCCAAAAUGA  | GCAAUCAUGG  | CGCAUCAUGU | GGACCUUGA  |            | UUCACCAACGG |
| Beauveria bassiana             | UUCAAGAUGC  | GUCAUCAUGG  | GCCAACAUGG | GUCGACUGA  | GCCAACAUC  | UUCACCAACGG |
| Botryotinia fuckeliana         | UUCAAGAUGC  | GUCAUCAUGG  | GCCAACAUGG | GAAUAUUGA  | GCAACAUAUC | UUCACCAACGG |
| Chaetomium globosum            | UUCAAGAUGC  | GUCAUCAUGG  | GCCAACAUGG | GUUGAAUGA  | GCCGCAUUC  | UUCACCAACGG |
| Chaetomium thermophilum        | UUCAAAAUGC  | GUCACCAUGG  | GCCAAGAUGA | GUUGAAUGA  | GCCACAUAUC | UUCACCAACGG |
| Cladosporium sphaerospermum    | GACACCAUGG  | GCAUCAUGG   | AACACCAUGG |            |            | UUCACCAACGG |
| Claviceps fusiformis           | GCCAAGAUGU  | GUCAACAUGG  | GCCAAGAUGA | GUUGAAUGG  | GCCAACAUC  | UUCACCAACGG |
| Claviceps paspali              | GCCAAGAUGU  | GUCAACAUGG  | GCCAAGAUGA | GCUGACUGG  | GCCAACAUC  | UUCACCAACGG |
| Coccidioides immitis           | UCCAUCAUGA  | GUCAACAUGG  | CGAGCGAUGU | GGACCUUGA  | CCAACCAUC  | UUCACCAACGG |
| Coccidioides posadasii         | UCCAUCAUGA  | GUCAACAUGG  | CGAGCGAUGU | GGACCUUGA  | CCAACCAUC  | UUCACCAACGG |
| Cochliobolus heterostrophus    | AUCAUAUGG   | GUCAACAUGG  | ACAAACUUGG |            |            | UUCACCAACGG |
| Colletotrichum gloeosporioides | CUCAAGAUGC  | AUCACCAUGG  | UCAAGAUGG  | GUCGAUUGA  | UCCACCAUC  | UUCACCAACGG |
| Colletotrichum higginsianum    | GCAACCAUGC  | AUCAUCAUGG  | CCAACAUGG  | GUCGAUUGA  | GCAACCAUC  | CUACCAACGG  |
| Cordyceps militaris            | UUCAAGAUGC  | GUCAACAUGG  | GGCACAUGA  | GUCGACUGA  | GCCAACAUC  | UUCACCAACGG |
| Cryphonectria parasitica       | AUCAAGAUGU  | GUCAACAUGG  | AACAUAUUGG |            |            | GCCAACAUC   |
| Daldinia eschscholzii          | AUCAAAAUGC  | GUCAAAAUGG  | GCCAGGAUGG | GAAGAAUGA  | GCCACCAUC  | UUCACCAACGG |
| Epichloe amarillans            | GUCAAGAUGC  | AUCAACAUGG  | GGCAAGAUGA | GUUGAUUGG  | GCCAAAUAUC | UUCACCAACGG |
| Epichloe brachyelytri          | GUCAAGAUGC  | AUCAACAUGG  | GGCAAGAUGA | GUUGAUUGG  | GCCAAAUAUC | UUCACCAACGG |
| Epichloe festucae              | GUCAAAAUGC  | AUCAACAUGG  | GGCAAGAUGA | GUUGAUUGG  | GCCAAAUAUC | UUCACCAACGG |
| Epichloe glyceriae             | GUCAAGAUGC  | AUCAACAUGG  | GGCAAGAUGA | GUUGAUUGG  | GCCAAAUAUC | UUCACCAACGG |
| Epichloe typhina               | GUCAAGAUGC  | AUCAACAUGG  | GGCAAGAUGA | GUUGAUUGG  | GCCAAAUAUC | UUCACCAACGG |
| Fusarium oxysporum             | GUCAAGAUGU  | GUCACCAUGG  | GCCAAGAUGA | GUCGACUGA  | GCCAACAUC  | UUCACCAACGG |
| Fusarium pseudograminearum     | AUCAAGAUGU  | AUCACCAUGG  | GCAAAGAUGA | GUCGACUGA  | GCCAACAUC  | UUCACCAACGG |
| Fusarium sporotrichioides      | AUCAACAUGU  | AUCACCAUGG  | GCAAAGAUGA | GUCGACUGA  | GCCAACAUC  | UUCACCAACGG |
| Gaeumannomyces graminis        | AUCAAGAUGU  | GUCACCAUGG  | GGCAAGAUGA | GAAGACUGA  | GUCACCAUC  | UUCACCAACGG |
| Geomyces destructans           | CCCAAAAUGG  | GUCACCAUGG  | ACAAACUUGG | CAAGACUGA  | UCCACCAUC  | UUUACCAACGG |
| Geomyces pannorum              | CACAAAUGG   | GUCAACAUGG  | AACAACUUGG | GAAGAUUGA  | ACCACCAUC  | UUUACCAACGG |
| Gibberella fujikuroi           | GUCAAGAUGU  | GUCACCAUGG  | GCCAAGAUGA | GUCGAUUGA  | GCCAACAUC  | UUCACCAACGG |
| Gibberella moniliformis        | GUCAAGAUGU  | GUCACCAUGG  | GCCAAGAUGA | GUCGACUGA  | GCCAACAUC  | UUCACCAACGG |
| Gibberella zeae                | AUCAAGAUGU  | AUCACCAUGG  | GCAAAGAUGA | GUCGACUGA  | GCCAACAUC  | UUCACCAACGG |
| Glarea lozoyensis              | GACACGAUGU  | ACCACCAUGG  | CCAACAUGG  | GAAGAUUGA  | GCCACCAUC  | UUCACCAACGG |
| Glomerella graminicola         | GCAACCAUGC  | AUCACAUGG   | CCCAAGAUGG | GUCGAUUGA  | GCAACCAUC  | UUCACCAACGG |
| Grosmanina clavigera           | GCAAGAUGC   | GUCAACAUGG  | AGCAAAAUGG | GUCGAUUGA  | GCAACCAUC  | UUCACCAACGG |
| Histoplasma capsulatum         | AAGAUAUUGG  | GUCACCAUGG  | UUGAAUUGG  | GGGCCUCUGA | ACAGCCAUU  | UUCACCAACGG |
| Hypocrea lixii                 | UUCAAGAUGA  | GUCAACAUGG  | GCCAAGAUGA | GUCGAUUGA  | GCCAACAUC  | UUCACCAACGG |
| Hypocrea vires                 | UUCAAGAUGA  | GUCAACAUGG  | GCCAAGAUGA | GUCGACUGA  | GCCAACAUC  | UUCACCAACGG |
| Leptosphaeria maculans         | AUCAUAUUGG  | GACACCAUGG  | ACAACUUGG  |            |            | UUCACCAACGG |
| Macrophomina phaseolina        | GUCAAAAUGU  | GUCACCAUGG  | GGCACAUGA  |            |            | UUCACCAACGG |
| Magnaporthe grisea             | GCCAAAUGG   | GUCACCAUGG  | ACCAAGAUGA | CCAGCUUGG  | GCCGCCAUUC | UUCACCAACGG |
| Magnaporthe poae               | AUCAAGAUGU  | GUCACCAUGG  | GGCAAGAUGA | GAAGACUGA  | GUCACCAUC  | UUCACCAACGG |
| Marssonina brunnea             | UCCACCAUGU  | CCCAAGAUGG  | CCCAACUUGG |            | UUCGCAUUC  | GCCACCAACGG |
| Metarhizium acridum            | UUCAAGAUGC  | AUCAACAUGG  | GCCAAGAUGA | GUUGAUUGG  | GCCACCAUC  | UUCACCAACGG |
| Metarhizium anisopliae         | UUCAAGAUGC  | AUCAACAUGG  | GCCAAGAUGA | GUUGAUUGG  | GCCACCAUC  | UUCACCAACGG |
| Microsporium canis             | UACAAGAUGG  | CCCAUCAUGG  | CAAACUUGG  | GGACCUUGA  | UUCACCAUC  | UUCACCAACGG |
| Myceliophthora thermophila     | ACCAAGAUGC  | GUCAAGAUGG  | GGCAAGAUGA | GUUGAAUGA  | GCCGCCAUUC | UUCACCAACGG |
| Mycosphaerella fijensis        | ACGAAAUGG   | GCAAACAUGG  | UUCGCAUUGG |            |            | UUCACCAACGG |
| Mycosphaerella graminicola     | UUAAACAUGG  | GCAAACAUGG  | UUCGCAUUGG |            |            | UUCACCAACGG |
| Mycosphaerella populorum       | UUCAAGAUGU  | GCAAACAUGG  | GGCACAUGG  |            |            | CCCAACAUC   |
| Nectria haematococca           | GUCAAGAUGU  | GUCAUCAUGG  | GCCAAGAUGA | GUCGACUGA  | GCCAACAUC  | UUCACCAACGG |
| Neosartorya fischeri           | UGCAAAAUGG  | GCAAACAUGG  | CGCAUCAUGU | GGACCUUGA  | AACAACAUC  | UUCACCAACGG |
| Neotyphodium gansuense         | GUCAAGAUGC  | AUCAACAUGG  | GCCAAGAUGA | GUUGAUUGG  | GCCAAAUAUC | UUCACCAACGG |
| Neurospora crassa              | AUCAAGAUGC  | GUCAACAUGG  | AACAAGAUGU | GUAGAUUGA  | GCCACCAUC  | UUCACCAACGG |
| Neurospora tetrasperma         | AUCAAGAUGC  | GUCAACAUGG  | AACAAGAUGU | GUAGAUUGA  | GCCACCAUC  | UUCACCAACGG |
| Ophiostoma novo-ulmi           | GCCACAUGC   | GCAAACAUGG  | AAAAAAUUGG | GUCGAUUGA  | GUCACAUC   | UUCACCAACGG |
| Ophiostoma piliferum           | GACACCAUGC  | GCAAACAUGG  | ACCAACAUGG | GUCGAAUGA  | GUCACCAUC  | UUCACCAACGG |
| Paracoccidioides brasiliensis  | ACGACGAUGG  | GCCACCAUGG  | CGCAUCAUGU | GGACCUUGG  | GUCACCAUC  | UUCACCAACGG |
| Passalora fulva                | ACGAACAUGG  | GCAAACAUGG  | UUCGCAUUGG |            |            | UUCACCAACGG |
| Penicillium chrysogenum        | GCCAAAUGG   | GCAAACAUGG  | CGUGUCAUGU | GGACCUUGA  | ACCCCGAUC  | UUCACCAACGG |
| Penicillium digitatum          | GCCAAAUGG   | GCAAACAUGG  | CGUGUCAUGU | GGACCUUGA  |            | UUCACCAACGG |
| Penicillium marneffeii         | UCCAUAUUGG  | GCAAACAUGG  | AGAGUCAUGU |            | ACCACCAUC  | UUCACCAACGG |
| Periglandula ipomoeae          | GUCAAGAUGC  | AUCAACAUGG  | GCCAAGAUGA | GUUGAUUGG  | GCCAACAUC  | UUCACCAACGG |
| Phaeosphaeria nodorum          | AACAAGAUGG  | GCAAACAUGG  | GCAGCCAUGG |            |            | UUCACCAACGG |
| Podospora anserine             | ACCAAGAUGC  | GUCAACAUGG  | GGCAAGAUGA | GUUGAAUGA  | ACCGCCAUC  | UUCACCAACGG |
| Pyrenophora teres              | CGAACAAUUGG | GUCAUCAUGG  | ACAAACUUGG |            |            | UCCAUCAACGG |
| Pyrenophora tritici-repentis   | CGAACAAUUGG | GUCAUCAUGG  | ACAAACUUGG |            |            | UCCAUCAACGG |
| Sclerotinia homoeocarpa        | AACAAGAUGU  | AUCAACAUGG  | CCAAACAUGG | GAAUCUUGU  | GCAACAUAUC | UUCACCAACGG |
| Sclerotinia sclerotiorum       | CUCAAAAUGU  | AUCAACAUGG  | AUAGACUUGG | GAAAUAUGA  |            | UUCACCAACGG |
| Septoria passerinii            | GUUAACAUGG  | GCAAACAUGG  | UUCGCAUUGG |            |            | UUCACCAACGG |
| Sordaria macrospore            | AUCAAGAUGC  | AUCAACAUGG  | AACAAGAUGU | GUAGAUUGA  | GCCACCAUC  | UUCACCAACGG |
| Talaromyces stipitatus         | UCCAUAUUGG  | GCAAACAUGG  | AGAGUCAUGU |            | UCCACCAUC  | UUCACCAACGG |
| Thermomyces lanuginosus        | GUCAUAUUGG  | GCAACCAUGG  | CAAGUCAUGG | GAUUCGUGA  | AACAACAUC  | UUCACCAACGG |
| Thielavia heterothallica       | ACCAAGAUGC  | GUCAAGAUGG  | GGCAAGAUGA | GUUGAAUGA  | GCCGCCAUUC | UUCACCAACGG |
| Thielavia terrestris           | AUCAAGAUGC  | GUCAAGAUGG  | GGCAAGAUGA | AGCACCUGG  | GCCGCCAUUC | UUCACCAACGG |
| Trichoderma atroviride         | UUCACGAUGA  | GUCAACAUGG  | GCCAAGAUGA | GUCGACUGA  | GCGAACAUC  | UUCACCAACGG |
| Trichoderma reesei             | UUCAAGAUGA  | GUCAACAUGG  | GCCAAGAUGA | GUCGACUGA  | GCCAACAUC  | UUCACCAACGG |
| Trichophyton rubrum            | UGCAAGAUGG  | CCCAUCAUGG  | GCGGAUUGG  | GGACCUUGA  | AUCACCAUC  | UUCACCAACGG |
| Trichophyton tonsurans         | UACAAGAUGG  | CCCAUCAUGG  | GCGGCAUUGG | GGACCUUGA  | AUCACCAUC  | UUCACCAACGG |
| Trichophyton verrucosum        | UGCAAGAUGG  | CCCAUCAUGG  | GCGGAUUGG  | GGACCUUGA  | AUCACCAUC  | UUCACCAACGG |
| Tuber melanosporum             | GUUAUCAUGG  | CCAGCCAUGG  | UACAACAUGG |            |            |             |
| Verticillium dahliae           | AUCACCAUGC  | UACACCAUGG  | GCGAACAUGA | GUUGAUUGA  | UUCUCCAUC  | GUCACCAACGG |
| "Citrus clementina" #1         | GACACCAUGG  | GCAAUCAUGG  | AUCACUUGG  |            |            | UUCACCAACGG |
| "Citrus clementina" #2         | GACAUCAUGG  | GCAAUCAUGG  | AUCACUUGG  |            |            | UUCACCAACGG |
| "Malus x domestica"            | AGAGUCAUGU  | ACCAACAUGG  | CCGACCAUGA |            |            | GCCACCAACGG |

## B

|                             |                     |
|-----------------------------|---------------------|
| Agaricus bisporus           | GUAGCU <u>AUUU</u>  |
| Antrodia cinnamomea         | UCAGCC <u>UUGU</u>  |
| Ceriporiopsis subvermispora | CCCGCC <u>UUGU</u>  |
| Coniophora puteana          | AGA <u>ACG</u> CUGC |
| Coprinopsis cinerea         | GGCGCC <u>AUUU</u>  |
| Dichomitus squalens         | CCCACC <u>UUGU</u>  |
| Fibroporia radiculosa       | UCCACC <u>UUGU</u>  |
| Fomitiporia mediterranea    | CCAGCC <u>AUUC</u>  |
| Ganoderma lucidum           | CCCGCC <u>UUGU</u>  |
| Gloeophyllum trabeum        | UUCGAG <u>AUAC</u>  |
| Heterobasidion annosum      | CUCGCG <u>AUUC</u>  |
| Heterobasidion irregulare   | CUCGCG <u>AUUC</u>  |
| Laccaria bicolor            | GCCGCA <u>AUUC</u>  |
| Lentinula edodes            | GUCGAA <u>AUUU</u>  |
| Omphalotus olearius         | GUCGCA <u>AUUU</u>  |
| Phanerochaete carnosae      | GCCGCC <u>UUGU</u>  |
| Phanerochaete chrysosporium | GCCGCC <u>UUGU</u>  |
| Piriformospora indica       | GCCAAG <u>AUUU</u>  |
| Pleurotus ostreatus         | GUAGCC <u>AUUU</u>  |
| Postia placenta             | UCCACC <u>UUGU</u>  |
| Punctularia strigosozonata  | GCCGUA <u>AUUC</u>  |
| Rhizoctonia solani          | GCCGCC <u>AUUU</u>  |
| Schizophyllum commune       | GCAGCC <u>AUAG</u>  |
| Serpula lacrymans           | UCCGCC <u>AUUU</u>  |
| Stereum hirsutum            | CCAGCC <u>AUAC</u>  |
| Trametes versicolor         | ACAGCC <u>UUGU</u>  |
| "Pinus taeda"               | GCCACC <u>UUGU</u>  |

## C

*Tuber melanosporum*  
FAGTTTCCTCTCCCCGATACAACCTCAAACCTCGTTTTCCACGCTTGTACCCCTGTAGAATCC  
TTCACCACGCCTTCCCAGAGATCTACGGACCTCTGAGCCCTTCGCTTAGCGACATTACCCCA  
CAACAGCCAGTCAACCATTCTTCCTCGGAACCAATTGTGTTCCCTCCAAACGACCAGCCATG

*Arthrobotrys oligospora*  
FGAATCGCCACCCCGCTCTCGTCTCCACCTCATCTCCAAATCCCCTTTGCCCCCTTTTACA  
AACAAAATAGCTTTCCTCTTTTTCAAAATCAGGCCCGTCTTTTAAAGACTGCCTGAT  
TTCCTACTCGCCAAAATACTTCGCTTAGCGAGTTACCACCCCCCAAACCGTCAAAATTTC  
CCCTCAACGACGCTCTGCGTTACGCACAAGCCCAAGATCCGCCAGGATG

### Supplementary Figure 2. Conservation of NCCs in *cpc-1* homologs of different fungi. (A and B)

Nucleotide sequences used for generating weblogo in Figure 1 and Supplementary Figure 5, respectively. Species identifiers of the sequences used are indicated on the left. Asterisk next to species name indicates sequence presumed to derive from unknown Pezizomycotina or Agaricomycetes that is contaminating an EST library of the indicated species (e.g. Agaricomycetes sequence contaminating *Pinus taeda* library). Presumed start codons are highlighted in green. Sequences from species names in quotation marks are presumed contaminants of fungal origin because they cluster with *cpc-1* from Pezizomycotina or Agaricomycetes even though the name of the sequenced species is plant. Alignments of the 10 nucleotides including the AUG or NCC start codons and the nucleotides that define the initiation contexts (-6 to +4) which were used to generate the weblogo in Figure 1 C-J, and Supplementary Figures 5D and 5E are shown for *cpc-1/GCN4* homologs from: (A) uAUG1 uAUG2, mAUG, NCC6, NCC7 and NCC8 from Pezizomycotina; (B) the Single NCC from Agaricomycetes. (C) Nucleotide sequences of the 5' regions of *cpc-1* homologs from the upstream in-frame stop codon to the uAUG in *Tuber melanosporum* and *Arthrobotrys oligospora*. NCCs are highlighted in green.
