# Supplementary material for: Translation Initiation from Conserved Non-AUG Codons Provides Additional Layers of Regulation and Coding Capacity
Source: PubMed Central journal article supplement (PMC5487733; doi:10.1128/mbio.00844-17), 2017-06-27
Supplement: mbo003173356sf3.pdf [file mbo003173356sf3.pdf]

B

iii.

Frame 1

|                                       |     |     |     |     |     |     |     |
|---------------------------------------|-----|-----|-----|-----|-----|-----|-----|
| <i>Aspergillus_oryzae</i>             | GGG | GGG | GGG | GTT | CCC | ATA | TTG |
| <i>Trichophyton_touarsense</i>        | GGT | OCT | OCT | ATA | ATA | TTG | TTG |
| <i>Myceliophthora_thermophila</i>     | GGG | GGG | CCT | GTT | ATA | TTG | TTG |
| <i>Gaeumannomyces_graminis</i>        | GGG | GGG | OCT | ATA | ATA | TTG | TTG |
| <i>Daldinia_escscholzii</i>           | GGG | GGG | GGG | OCT | ATA | TTG | TTG |
| <i>Trichoderma_atroviride</i>         | GGG | GGG | GGG | OCT | ATA | TTG | TTT |
| <i>Fusarium_oxysporum</i>             | AGG | OCT | OCT | GTT | ATA | TTG | TTT |
| <i>Thielavia_terrestris</i>           | GGG | GGG | GGG | GTT | ATA | TTG | TTT |
| <i>Claviceps_fusiformis</i>           | GGT | OCT | OCT | ATA | ATA | TTG | TTT |
| <i>Periglandula_ipomoeae</i>          | GGG | OCT | GGG | GGG | CCC | TTG | TTG |
| <i>Neosartorya_fischeri</i>           | GGT | GGG | OCT | GTT | ATA | TTG | TTT |
| <i>Ophiostoma_piliferum</i>           | GGT | OCT | OCT | ATA | ATA | TTG | TTT |
| <i>Gibberella_zeae</i>                | GGG | GGG | GGG | GGG | GGG | ATA | TTG |
| <i>Beauveria_bassiana</i>             | GGG | GGG | GGG | GGG | GGG | ATA | TTG |
| <i>Cordyceps_militaris</i>            | GGG | GGG | GGG | GTT | CCC | ATA | TTG |
| <i>Arthroderma_benhamiae</i>          | GGT | OCT | OCT | ATA | ATA | TTG | TTT |
| <i>Aspergillus_niger</i>              | GGG | GGG | GGG | GGG | CCC | ATA | TTT |
| <i>Verticillium_dahliae</i>           | GGG | GGG | GGG | GTT | ATA | TTA | TTG |
| <i>Fusarium_pseudograminearum</i>     | GGG | GGG | GGG | GGG | GGG | ATA | TTG |
| <i>Tuber_melanosporum</i>             | GAG | GAA | GAA | GAG | ATA | ATT | CTT |
| <i>Ophiostoma_novo-ulmi</i>           | GGT | GGG | GGG | GGG | GGG | GGG | GGG |
| <i>Ajellomyces_dermatitidis</i>       | OCT | GGG | GGG | GTT | ATA | TTG | TTT |
| <i>Phaeosphaeria_nodorum</i>          | GAC | OCT | GGG | GGG | GGG | GGG | GGG |
| <i>Hypocrea_jecorina</i>              | GGG | GGG | GGG | GGG | GGG | TTG | TTT |
| <i>Colletotrichum_higginsianum</i>    | GGG | GGG | GGG | GGG | GGG | TTG | TTT |
| <i>Amorphotheca_resinae</i>           | GGG | OCT | GAA | GGG | GGG | GGG | GGG |
| <i>Coccidioides_posadasii</i>         | GGT | OCT | GGG | GTT | CCC | ATA | TTT |
| <i>Marsominia_brunnea</i>             | GGT | OCT | GGG | GGG | GGG | GGG | GGG |
| <i>Glomerella_graminicola</i>         | GGG | GGG | OCT | GGG | GGG | TTG | TTT |
| <i>Botryotinia_fuckeliana</i>         | GGT | OCT | GAA | GGG | GGG | TTG | TTT |
| <i>Cryphonectria_parasitica</i>       | GGT | GGG | OCT | GTT | ATA | TTA | TTG |
| <i>Magnaporthe_roseae</i>             | GGT | GGG | OCT | GGG | GGG | GGG | GGG |
| <i>Pyrenophora_terres</i>             | GGT | GGG | OCT | GTT | ATA | TTG | TTT |
| <i>Septoria_passerinii</i>            | GGG | OCT | GGG | GGG | GGG | GGG | GGG |
| <i>Geomyces_panorum</i>               | GGG | GGG | GAA | GGG | GGG | GGG | GGG |
| <i>Aspergillus_sojae</i>              | GGG | GGG | GGG | GTT | CCC | ATA | TTG |
| <i>Penicillium_chrysogenum</i>        | GGG | GGG | GGG | GGG | GGG | GGG | GGG |
| <i>Neurospora_crassa</i>              | GGG | OCT | OCT | GTT | CCC | TTG | TTT |
| <i>Epichloe_brachyelytri</i>          | GGT | GGG | OCT | GTT | CCC | TTG | TTT |
| <i>Pyrenophora_tritici-repentis</i>   | GGT | OCT | GGG | GTT | ATA | TTG | TTT |
| <i>Coccidioides_immutis</i>           | OCT | OCT | GGG | GTT | CCC | TTG | TTT |
| <i>Aspergillus_fumigatus</i>          | GGT | GGG | OCT | GTT | ATA | TTG | TTT |
| <i>Hypocrea_vizens</i>                | GGG | GGG | GGG | GGG | GGG | GGG | GGG |
| <i>Hypocrea_litii</i>                 | GGG | GGG | GGG | GGG | GGG | TTG | TTT |
| <i>Ascocoryne_sarcoides</i>           | GGT | GGG | GAA | GGG | GGG | TTG | TTT |
| <i>Epichloe_festucae</i>              | GGT | GGG | OCT | GGG | GGG | TTG | TTT |
| <i>Magnaporthe_grisea</i>             | GGG | GGG | OCT | GGG | GGG | GGG | GGG |
| <i>Cordyceps_bassiana</i>             | GGT | GGG | OCT | GGG | GGG | GGG | GGG |
| <i>Arthroderma_gypseum</i>            | GGT | OCT | GGG | GGG | GGG | TTG | TTT |
| <i>Aspergillus_nubilans</i>           | GGT | GGG | OCT | GGG | GGG | GGG | GGG |
| <i>Trichoderma_reesei</i>             | GGG | GGG | GGG | GGG | GGG | TTG | TTT |
| <i>Mycosphaerella_fijiensis</i>       | GGG | GGG | OCT | GGG | GGG | GGG | GGG |
| <i>Claviceps_paspali</i>              | GGG | GGG | GGG | GGG | GGG | GGG | GGG |
| <i>Epichloe_glyceriae</i>             | GGT | GGG | OCT | GGG | GGG | TTG | TTT |
| <i>Cochliobolus_heterostrophus</i>    | GGT | GGG | OCT | GGG | GGG | GGG | GGG |
| <i>Aspergillus_terreus</i>            | GGG | GGG | OCT | GTT | ATA | TTG | TTT |
| <i>Chaetomium_globosum</i>            | GGG | GGG | OCT | GGG | GGG | GGG | GGG |
| <i>Gibberella_moniliformis</i>        | GGG | OCT | GGG | GGG | GGG | GGG | GGG |
| <i>Podospora_anserina</i>             | GGG | GGG | GGG | GTT | CCC | TTG | TTT |
| <i>Arthrobotrys_oligospora</i>        | ATT | GGG | ATT | ATT | CCC | ATT | ATT |
| <i>Gosmania_clavigera</i>             | GGG | GGG | GGG | GGG | GGG | GGG | GGG |
| <i>Metarhizium_acridum</i>            | GGG | OCT | OCT | GGG | GGG | TTG | TTT |
| <i>Aciculosporium_takei</i>           | GGT | OCT | OCT | GTT | ATA | TTG | TTT |
| <i>Sordaria_macrospora</i>            | GGG | OCT | OCT | GGG | GGG | TTG | TTT |
| <i>Neotyphodium_ganuense</i>          | GGT | GGG | OCT | GGG | GGG | TTG | TTT |
| <i>Passalora_fulva</i>                | GGG | GGG | OCT | GGG | GGG | GGG | GGG |
| <i>Mycosphaerella_populorum</i>       | GGT | GGG | OCT | GGG | GGG | GGG | GGG |
| <i>Aspergillus_kawachii</i>           | GGG | GGG | GGG | GGG | GGG | GGG | GGG |
| <i>Chaetomium_thermophilum</i>        | GGG | ATT | GGG | GGG | GGG | GGG | GGG |
| <i>Epichloe_amarillans</i>            | GGT | GGG | OCT | GGG | GGG | TTG | TTT |
| <i>Microsporium_canis</i>             | GGT | GGG | GGG | GGG | GGG | GGG | GGG |
| <i>Trichophyton_verrucosum</i>        | GGT | OCT | OCT | GGG | GGG | TTG | TTT |
| <i>Trichophyton_rubrum</i>            | GGT | OCT | OCT | GGG | GGG | TTG | TTT |
| <i>Talaromyces_stipitatus</i>         | GGT | OCT | GGG | GTT | ATA | TTG | TTT |
| <i>Cladosporium_sphaerospermm</i>     | GGG | GGG | GGG | GGG | GGG | GGG | GGG |
| <i>Mycosphaerella_graminicola</i>     | GGG | OCT | GGG | GTT | ATA | TTG | TTT |
| <i>Penicillium_digitatum</i>          | GGG | OCT | OCT | GGG | GGG | GGG | GGG |
| <i>Neurospora_tetrasperma</i>         | GGG | OCT | OCT | GTT | CCC | TTG | TTT |
| <i>Metarhizium_anisopliae</i>         | GGG | OCT | OCT | GGG | GGG | GGG | GGG |
| <i>Geomyces destructans</i>           | GGT | OCT | GAG | GGG | GGG | GGG | GGG |
| <i>Penicillium_mamefiei</i>           | GGT | OCT | GGG | GTT | ATA | TTG | TTT |
| <i>Nectria_haematococca</i>           | GGG | OCT | OCT | GTT | ATA | TTG | TTT |
| <i>Verticillium_albo-atrum</i>        | GGG | GGG | GGG | GGG | GGG | GGG | GGG |
| <i>Paracoccidioides_brasiliensis</i>  | GGT | GGG | OCT | GTT | ATA | TTG | TTT |
| <i>Leptosphaeria_maculans</i>         | GGG | OCT | GGG | GTT | CCC | TTG | TTT |
| <i>Aspergillus clavatus</i>           | GGT | OCT | GGG | GGG | GGG | TTG | TTT |
| <i>Glarea_lozoyensis</i>              | GGG | GGG | OCT | GGG | GGG | GGG | GGG |
| <i>Colletotrichum_gloeosporioides</i> | GGG | OCT | GGG | GTT | ATA | TTG | TTT |
| <i>Gibberella_fujikuroi</i>           | GGT | OCT | GGG | GTT | ATA | TTG | TTT |
| <i>Alternaria_aboroscens</i>          | GGT | OCT | GGG | GTT | ATA | TTG | TTT |
| <i>Macrophomina_phaseolina</i>        | GGT | OCT | GGG | GTT | ATA | TTG | TTT |
| <i>Epichloe_typhina</i>               | GGG | GGG | OCT | GGG | GGG | TTG | TTT |

363 synonymous  
30 non-synonymous

iv.

Frame 2

|                                      |     |     |     |     |     |     |     |
|--------------------------------------|-----|-----|-----|-----|-----|-----|-----|
| <i>Aspergillus_oryzae</i>            | GGG | GGG | GGG | TTC | GGG | TAT | TCA |
| <i>Trichophyton_touarsense</i>       | GTC | CTC | CTG | TAG | CAT | TGT | GGG |
| <i>Myceliophthora_thermophila</i>    | GGG | GGG | CTG | TTC | TTT | TTT | TTT |
| <i>Gaeumannomyces_graminis</i>       | GGG | GGG | CTG | TTC | GGG | TAT | GGG |
| <i>Daldinia_escscholzii</i>          | GGG | GAG | CTG | TAG | CAT | TGT | TCA |
| <i>Trichoderma_atroviride</i>        | GAG | CAC | GAG | TGC | TTT | TGT | TTT |
| <i>Fusarium_oxysporum</i>            | GGG | CTC | GAG | TTC | TTT | TTT | TTT |
| <i>Thielavia_terrestris</i>          | GGG | GGG | GGG | TTC | TTT | TTT | TTT |
| <i>Claviceps_fusiformis</i>          | GTC | CTC | CTG | TGC | OCT | TAT | GGG |
| <i>Periglandula_ipomoeae</i>         | GAG | CTC | GGG | TAG | OCT | TGT | TCA |
| <i>Neosartorya_fischeri</i>          | GTC | GGG | CTG | TTC | CAT | TGT | TTT |
| <i>Ophiostoma_piliferum</i>          | GTC | CTC | CTG | TGC | GGT | TGT | TTT |
| <i>Gibberella_zeae</i>               | GAG | CCC | GAG | TAG | CTC | TTT | TTT |
| <i>Beauveria_bassiana</i>            | GGG | GGG | GGG | TGC | TTC | TTT | TCA |
| <i>Cordyceps_militaris</i>           | GGG | GGG | GGG | TTC | GGG | TTT | TCA |
| <i>Arthroderma_benhamiae</i>         | GTC | CTC | CTG | TAG | OCT | TGT | TTT |
| <i>Aspergillus_niger</i>             | GGG | CAC | GGG | TTC | TAT | TTA | TTA |
| <i>Verticillium_dahliae</i>          | GGG | CAC | GAG | TTC | CAT | TGT | GGG |
| <i>Fusarium_pseudograminearum</i>    | GGG | CAC | GGG | TAG | CTC | TAT | TTT |
| <i>Tuber_melanosporum</i>            | AGC | AAC | AAC | AGG | ATA | TTC | TTG |
| <i>Ophiostoma_novo-ulmi</i>          | GTC | GGG | GGG | TGC | GGG | GGG | GGG |
| <i>Ajellomyces_dermatitidis</i>      | GTC | GGG | GAG | TTC | CAT | TGT | TTA |
| <i>Phaeosphaeria_nodorum</i>         | GGG | CTC | GGG | TAG | CAT | TGT | TTT |
| <i>Hypocrea_jecorina</i>             | GGG | CAC | GGG | TAG | OCT | TGT | TTT |
| <i>Colletotrichum_higginsianum</i>   | GGG | CAC | GGG | TAG | OCT | TGT | TTT |
| <i>Amorphotheca_resinae</i>          | GGG | CTC | AAG | TTC | GGG | TGT | GGG |
| <i>Coccidioides_posadasii</i>        | GTC | CTC | GAG | TTC | GGG | TGT | TTT |
| <i>Marsominia_brunnea</i>            | GTC | CTC | AAG | TTC | GGG | TGT | TTT |
| <i>Glomerella_graminicola</i>        | GGG | GGG | CTG | TGC | GGT | TGT | TTT |
| <i>Botryotinia_fuckeliana</i>        | GTC | CTC | AAG | TTC | OCT | TGT | TTT |
| <i>Cryphonectria_parasitica</i>      | GTC | CAC | CTG | TTC | TTT | TAT | TCA |
| <i>Magnaporthe_roseae</i>            | GTC | GGG | CTG | TTC | GGG | TTT | TTT |
| <i>Pyrenophora_terres</i>            | GTC | GGG | CTG | TTC | AAC | TGT | TTT |
| <i>Septoria_passerinii</i>           | GGG | CTC | GAG | TTC | GAG | TGT | TTT |
| <i>Geomyces_panorum</i>              | GAG | GGG | AAG | TTC | GGG | TGT | TTT |
| <i>Aspergillus_sojae</i>             | GGG | GGG | GGG | TTC | TAT | TCA | TCA |
| <i>Penicillium_chrysogenum</i>       | GGG | CAC | CCA | TGC | GGG | TTT | TTA |
| <i>Neurospora_crassa</i>             | GGG | CTC | CTG | TTC | OCT | TGT | TTT |
| <i>Epichloe_brachyelytri</i>         | GTC | GGG | CTG | TTC | OCT | TGT | TTA |
| <i>Pyrenophora_tritici-repentis</i>  | GTC | CTC | GGG | TTC | CAT | TGT | TTT |
| <i>Coccidioides_immutis</i>          | GTC | CTC | GAG | TTC | GGG | TGT | TTT |
| <i>Aspergillus_fumigatus</i>         | GTC | GGG | CTG | TTC | TAT | TGT | TTT |
| <i>Hypocrea_vizens</i>               | GGG | CAC | GAG | TAG | GGG | TGT | TTA |
| <i>Hypocrea_litii</i>                | GGG | CAC | GAG | TAG | OCT | TGT | TTA |
| <i>Ascocoryne_sarcoides</i>          | GTC | GGG | AAG | TTC | CAT | TGT | TTT |
| <i>Epichloe_festucae</i>             | GTC | GGG | CTG | TAG | OCT | TGT | TTA |
| <i>Magnaporthe_grisea</i>            | GAG | GGG | CTG | TGC | GGT | TTT | TTT |
| <i>Cordyceps_bassiana</i>            | GTC | GGG | GGG | TGC | GGT | TTT | TCA |
| <i>Arthroderma_gypseum</i>           | GTC | CTC | GAG | TAG | OCT | TGT | TCA |
| <i>Aspergillus_nubilans</i>          | GTC | GAG | CTG | TTC | GGG | TGT | TCA |
| <i>Trichoderma_reesei</i>            | GGG | CAC | GAG | CTG | OCT | TGT | TTT |
| <i>Mycosphaerella_fijiensis</i>      | GGG | CAC | CTG | TTC | GGT | TTT | TTT |
| <i>Claviceps_paspali</i>             | GTC | GGG | GGG | TTC | CAT | TGT | TCA |
| <i>Epichloe_glyceriae</i>            | GTC | GGG | CTG | TAG | OCT | TGT | TTA |
| <i>Cochliobolus_heterostrophus</i>   | GTC | GGG | GGG | TTC | GGG | TTT | TTT |
| <i>Aspergillus_terreus</i>           | GGG | GGG | CTG | TTC | TTT | TAT | TCA |
| <i>Chaetomium_globosum</i>           | GAG | GAG | CTG | TTC | GGG | TTT | TTT |
| <i>Gibberella_moniliformis</i>       | GGG | CTC | GAG | TTC | GGG | TTT | TTT |
| <i>Podospora_anserina</i>            | GGG | CAC | GGG | TTC | GGG | TTT | TTT |
| <i>Arthrobotrys_oligospora</i>       | TTT | CCA | TTT | TTT | TTA | TTT | TTT |
| <i>Gosmania_clavigera</i>            | GGG | GGG | GGG | GGG | GGG | GGG | GGG |
| <i>Metarhizium_acridum</i>           | GGG | CTC | CTG | TAG | CAT | TGT | TCA |
| <i>Aciculosporium_takei</i>          | GTC | CTC | CTG | TTC | TTT | TAT | TTA |
| <i>Sordaria_macrospora</i>           | GGG | CTC | CTG | TTC | OCT | TGT | TTT |
| <i>Neotyphodium_ganuense</i>         | GTC | GGG | CTG | TAG | OCT | TGT | TTT |
| <i>Passalora_fulva</i>               | GAG | CAC | CTG | TGC | GGT | TTT | TTT |
| <i>Mycosphaerella_populorum</i>      | GTC | CAC | CTG | TAG | CAT | TGT | TCA |
| <i>Aspergillus_kawachii</i>          | GGG | CAC | GGG | TTC | GGG | TGT | TCA |
| <i>Chaetomium_thermophilum</i>       | GGG | ATT | GGG | TTC | GGG | TGT | TCA |
| <i>Epichloe_amarillans</i>           | GTC | GGG | CTG | TAG | OCT | TGT | TTA |
| <i>Microsporium_canis</i>            | GTC | GGG | GAG | TTC | GGG | TGT | TTT |
| <i>Trichophyton_verrucosum</i>       | GTC | CTC | CTG | TAG | OCT | TGT | GGG |
| <i>Trichophyton_rubrum</i>           | GTC | CTC | CTG | TAG | OCT | TGT | GGG |
| <i>Talaromyces_stipitatus</i>        | GTC | CTC | GGG | TTC | TTT | TAT | TTA |
| <i>Cladosporium_sphaerospermm</i>    | GAG | CAC | GGG | TTC | GGG | TTT | TTT |
| <i>Mycosphaerella_graminicola</i>    | GGG | CTC | GAG | TTC | CAT | TGT | TTT |
| <i>Penicillium_digitatum</i>         | GGG | CTC | TTC | TGC | GGG | TTT | TCA |
| <i>Neurospora_tetrasperma</i>        | GGG | CTC | CTG | TTC | OCT | TGT | TTT |
| <i>Metarhizium_anisopliae</i>        | GGG | GGG | CTG | TAG | CAT | TGT | TCA |
| <i>Geomyces destructans</i>          | GTC | GGG | GGG | GGG | GGG | GGG | GGG |
| <i>Penicillium_mamefiei</i>          | GTC | CTC | GGG | TTC | TTT | TAT | TTA |
| <i>Nectria_haematococca</i>          | GGG | CTC | CTG | TTC | TTT | TTT | TTT |
| <i>Verticillium_albo-atrum</i>       | GGG | CAC | GAG | TTC | GGG | TGT | TTT |
| <i>Paracoccidioides_brasiliensis</i> | GTC | GGG | GAG | TTC | TAT | TGT | TCA |
| <i>Sclerotinia_homoecarpa</i>        | GTC | CTC | AAG | TTC | GGG | TTT | TTT |
| <i>Leptosphaeria_maculans</i>        | GGG | GGG | GGG | TTC | GGG | TTT | TTT |
| <i>Aspergillus clavatus</i>          | GTC | CTC | GGG | TTC | GGG | TGT | TTT |
|                                      |     |     |     |     |     |     |     |

C

**vi.**

|                             |     |     |     |     |     |     |     |     |     |     |     |     |     |     |     |     |     |
|-----------------------------|-----|-----|-----|-----|-----|-----|-----|-----|-----|-----|-----|-----|-----|-----|-----|-----|-----|
| Serpula_lacrymans           | GTT | GCT | GCC | GAA | TAT | GGC | ATA | CCC | CAG | TCT | ATA | CCA | CCA | CCT | CGT | ACA | ACT |
| Heterobasidion_irregulare   | ATA | GCT | GCC | CAT | CAT | GGG | ATA | CCC | GAA | GAA | ATA | CCC | CCA | CCA | CGT | ACA | ACT |
| Lenitula_edodes             | ATA | GCT | GCC | GAG | TAT | GGG | ATT | CCC | GAA | GAA | ATA | CCC | CCA | CCA | CGT | ACA | TCA |
| Coprinopsis_cinerea         | GTT | GCA | GCC | GAA | TAT | GGC | ATC | CCC | GAA | GTT | ATA | CCA | CCA | CCT | GTT | ACA | ACA |
| Dichomitus_squalens         | ATA | GCT | GCC | CAT | CAT | GGG | ATC | CCC | GAA | GAA | ATA | CCC | CCA | CCA | CGT | ACA | ACA |
| Ganoderma_lucidum           | ATG | GCT | GCT | CAT | CAT | GGG | ATC | CCC | GAA | GAA | ATA | CCC | CCA | CCA | CGT | ACA | TCC |
| Piriformospora_indica       | CTC | CCC | GCC | CAT | TTC | ATA | CCC | CCC | ACT | ACC | ACA | TCC | CCA | CCA | GTT | TCC | BCC |
| Ceriporiopsis_subvermispora | ATA | GCT | GCT | CAT | CAT | GGC | ATA | CCC | CAG | TCT | ATA | CCA | CCA | CCA | CGT | ACA | ACT |
| Schizophyllum_commune       | ATG | CCC | GGC | CAA | CAT | SCC | CTG | CCG | ATG | ACC | CTT | CCA | CCA | CCA | CGT | ACC | ACT |
| Phanerochaete_chrysosporium | CTC | GCT | GCC | GAA | CAT | GAA | ATC | CCC | CAG | TCT | ATA | CCA | CCA | CCA | GTT | ACT | ACT |
| Fibroporia_radiculosa       | ATA | GCT | GCT | GAA | CAT | GGC | ATC | CCC | CAG | TCT | ATA | CCA | CCA | CCA | CGT | ACA | ACT |
| Omphalotus_olearius         | GTT | CCC | GCC | GAG | TAT | GGG | ATT | CCC | CAG | TCT | ATA | CCA | CCA | CCA | CGT | ACA | ACT |
| Stereum_hirsutum            | CTC | CCC | GCT | CAT | CAT | GGG | ATC | CCC | CAG | TCT | ATA | CCA | CCA | CCA | GTT | ACT | ACT |
| Coniophora_puteana          | CTC | CCC | GCC | CAT | TAT | GGC | ATC | CCC | CAG | TCT | ATA | CCA | CCA | CCA | CGT | ACA | ACT |
| Pleurotus_ostreatus         | ATG | CCA | AAT | CAT | TAT | GGC | ATC | CCC | AGG | ATT | ATA | CCA | CCA | CCA | CGT | ACA | ACT |
| Gloeophyllum_trabeum        | CTC | GCT | AGT | GAA | TAT | GGC | ATC | CCC | CAG | GAA | ATA | CCA | CCA | CCA | CGT | ACA | ACT |
| Fomitiporia_mediterranea    | ATG | CCC | GCA | GAG | CAT | GAA | CTG | CCC | ACT | AAG | ATA | CCA | CCA | CCA | CGT | ACA | ACT |
| Heterobasidion_annosum      | ATA | GCT | GCC | CAT | CAT | GGG | ATA | CCC | GAA | GAA | ATA | CCA | CCA | CCA | CGT | ACA | ACT |
| Phanerochaete_carnosa       | CTC | GCT | GCT | GAA | CAT | GAA | ATC | CCC | CAG | TCT | ATA | CCA | CCA | CCA | GTT | ACT | ACT |
| Laccaria_bicolor            | ATA | CCC | GCC | GAG | TAT | GGG | ATC | CCC | CAG | TCT | ATA | CCA | CCA | CCA | CGT | ACA | ACT |
| Postia_placenta             | ATA | GCT | GCT | CAT | CAT | GGC | ATC | CCC | CAG | TCT | ATA | CCA | CCA | CCA | GTT | ACT | ACT |
| Rhizoctonia_solani          | ACT | CAA | TAT | GGT | ATA | AAT | ATC | CCC | ACA | GAA | ATA | CCA | CCA | CCA | GTT | ACT | ACT |
| Antrodia_cinnanomea         | ATA | GCT | GCA | CAT | CAT | GGC | ATC | CCC | CAG | TCT | ATA | CCA | CCA | CCA | CGT | ACA | ACT |
| Punctularia_strigosozonata  | CTC | CCC | GGC | GAA | CAT | GGC | ATA | CCC | CAG | TCT | ATA | CCA | CCA | CCA | GTT | ACT | ACT |
| Trametes_versicolor         | ATA | GCT | GCT | CAT | CAT | GGG | ATC | CCC | CAG | TCT | ATA | CCA | CCA | CCA | GTT | ACT | ACT |
| Agaricus_bisporus           | ATA | GCA | GCT | CAT | CAT | GGC | ATA | CCC | ACA | ACA | ATA | CCA | CCA | CCA | CGT | ACA | ACT |
| Pinus_taeda_cont            | ATA | GCT | GCT | CAT | CAT | GGG | ATC | CCC | CAG | TCT | ATA | CCA | CCA | CCA | CGT | ACA | ACT |

193 synonymous  
85 non-synonymous

uORF (long) AUG

**vii.**

|                             |     |     |     |     |     |     |     |     |     |     |     |     |     |     |     |     |     |     |
|-----------------------------|-----|-----|-----|-----|-----|-----|-----|-----|-----|-----|-----|-----|-----|-----|-----|-----|-----|-----|
| Serpula_lacrymans           | TTG | CTG | CCC | ACT | ATG | GCA | TAC | CCC | AGT | CTC | TGC | CTC | CAG | CAC | CTC | GTA | CAA | CTC |
| Heterobasidion_irregulare   | TAG | CTG | CCC | ATC | ATG | GGA | TAC | CCC | AAG | AAC | TGC | CCC | CAC | CAC | CTC | GTA | CAA | CTC |
| Lenitula_edodes             | TAG | CTG | CCC | ACT | ATG | GCA | TTC | GAG | AAG | CAE | TGC | CTC | GGC | GGC | GAG | GTA | DAT | CAC |
| Coprinopsis_cinerea         | TTG | CAG | CCC | ACT | ATG | GCA | TCC | CAC | AAC | TTC | TGC | GGC | CAG | GGC | CTC | GCA | CAA | CAC |
| Dichomitus_squalens         | TAG | CTG | CCC | ATC | ATG | GAA | TCC | CCC | AAT | GGC | ATC | CCC | GGG | TTC | CTC | GAA | CAA | CCA |
| Ganoderma_lucidum           | TGG | CTG | CTC | ATC | ATG | GAA | TCC | CCC | AAT | GGC | ATC | CTC | CAG | TTC | CTC | BAA | DAT | CCA |
| Piriformospora_indica       | TCC | CCG | CCC | ACT | ATG | GTC | GGC | GGA | ATA | CCA | CAT | CCC | CTT | CAC | CCG | TTC | CCG | CCA |
| Ceriporiopsis_subvermispora | TAG | CTG | CTC | ATC | ATG | GCA | TTC | CTG | AGT | CTC | TGC | CCC | CAG | GGC | CTC | GTA | CAA | CTC |
| Schizophyllum_commune       | TGG | CCG | GGG | AAG | ATG | CTC | TGC | GGA | TGC | CTC | CAC | GGC | GGC | CTC | GTT | DCA | CTT |     |
| Phanerochaete_chrysosporium | TGG | CTG | CCC | ACC | ATG | GAA | TCC | GTC | AGT | CTC | TGC | CCC | GGG | TTC | CTC | GAA | GTA | CTC |
| Fibroporia_radiculosa       | TAG | CTG | CTC | ACC | ATG | GCA | TCC | CCC | AGT | TTC | TGC | GGC | GGC | TCC | CTC | GTA | CAA | CTC |
| Omphalotus_olearius         | TTG | CCG | CCC | ACT | ATG | GGA | TTC | CTC | AGT | CTC | TTC | CAA | GAC | CCG | GAG | GTA | CAA | GTA |
| Stereum_hirsutum            | TGG | CCG | CTC | ATC | ATG | GAA | TCC | GGC | AAT | CTC | TGC | GGC | GGC | CAC | GAG | GCA | CAA | CAC |
| Coniophora_puteana          | TGG | CCG | CCC | ACT | ATG | GCA | TCC | CTC | AGT | CTC | TGC | GGC | GGC | CAC | CTC | GTA | CAA | CTC |
| Pleurotus_ostreatus         | TGG | GAA | ATC | ACT | ATG | GCA | TCC | GGC | GGA | TTC | TGC | GGC | CAG | CTC | CAC | GAG | GTA | GTA |
| Gloeophyllum_trabeum        | TGG | GTA | CTC | AAT | ATG | GCA | TCC | CCC | AGG | AAT | TGC | CTC | CAG | TCC | CTC | GTA | CAA | GGC |
| Fomitiporia_mediterranea    | TGG | CCG | CAC | ACC | ATG | GAC | TCC | GTA | GTA | AGC | TGC | GGC | GTA | TTC | CCG | GTT | TCA | ACA |
| Heterobasidion_annosum      | TAG | CTG | CCC | ATC | ATG | GGA | TAC | CCC | AAG | AAG | TGC | CCC | CAC | CAC | CTC | GTA | CAA | CTC |
| Phanerochaete_carnosa       | TGG | CTG | CTC | ACC | ATG | GAA | TCC | CTC | AAT | CCC | TTC | CCC | GGG | TTC | CTC | GCA | GTA | CTC |
| Laccaria_bicolor            | TAG | CCG | CCC | ACT | ATG | GTA | TCC | GAG | ATA | TTC | TGC | CAG | CAG | GGC | CCG | GAA | CTG | TAC |
| Postia_placenta             | TAG | CTG | CTC | ATC | ATG | GCA | TCC | CCC | AGT | TTC | TGC | CCC | CTG | TAC | CTC | BAA | CAA | CTC |
| Rhizoctonia_solani          | CTC | AAT | ATG | GTA | TAA | ATA | TCC | GGC | CAG | AAC | TGC | CTC | CCG | CTC | CCG | GCA | GTA | CTC |
| Antrodia_cinnanomea         | TAG | CTG | GAG | ATC | ATG | GCA | TCC | CTC | AGT | TCT | TAC | CCC | CTG | TGC | CCG | GTA | GTA | CTC |
| Punctularia_strigosozonata  | TGG | CCG | GGC | ACC | ATG | GCA | TAC | GGC | AGT | TCC | TTC | CTC | GGG | GGC | CAG | BAA | CAT | ATC |
| Trametes_versicolor         | TAG | CTG | CTC | ATC | ATG | GAA | TCC | CCC | AGT | GGC | TTC | CAC | CAG | TAC | CTC | BAA | CAA | CCA |
| Agaricus_bisporus           | TAG | CAG | CTC | ATC | ATG | GCA | TTC | GGC | CAG | ATC | GAG | CAC | TGC | CCG | AAA | DAT | CAT |     |
| Pinus_taeda_cont            | TAG | CTG | CTC | ATC | ACT | GTA | TCC | GGA | TGT | CCT | TAC | CCC | GAA | CAC | CCG | GTA | CAG | TGA |

15 synonymous  
275 non-synonymous

**viii.**

|                             |     |     |     |     |     |     |     |     |     |     |     |     |     |     |     |     |     |     |
|-----------------------------|-----|-----|-----|-----|-----|-----|-----|-----|-----|-----|-----|-----|-----|-----|-----|-----|-----|-----|
| Serpula_lacrymans           | TGC | TGC | CCA | CTA | TGG | CAT | ACC | CCA | GTC | TCT | GCC | TCC | AGC | ACC | TCG | TAC | AAC | TCC |
| Heterobasidion_irregulare   | AGC | TGC | CCA | TCA | TGG | GAT | ACC | CCA | ACA | AGT | GCC | CCC | AGC | ACC | TCG | TAC | AAC | TCC |
| Lenitula_edodes             | AGC | TGC | CCA | CTA | TGG | CAT | TCC | ACA | AGC | ACT | GCC | TGG | GGC | GGC | ACC | TAC | ATC | ACC |
| Coprinopsis_cinerea         | TGC | AGC | CCA | CTA | TGG | CAT | CCC | ACA | ACT | TTC | GCC | GGC | AGC | GGC | TCG | CAC | AAC | ACC |
| Dichomitus_squalens         | AGC | TGC | CCA | TCA | TGG | AAT | CCC | CCA | ATC | GCT | CCC | CCC | GGT | TCC | TCG | AAC | AAC | GAA |
| Ganoderma_lucidum           | GGC | TGC | TCA | TCA | TGG | AAT | CCC | CCA | ATC | GCT | TCC | TCC | AGT | TCC | TCG | AAC | ATC | CAA |
| Piriformospora_indica       | CCG | GGC | CCA | TTC | GGG | TCC | GGC | GAG | TAC | CAC | ATC | CCC | TTC | ACC | DCT | TTC | GGC | GAA |
| Ceriporiopsis_subvermispora | AGC | TGC | TCA | TCA | TGG | CAT | TCC | TCA | GTC | TCT | GCC | CCC | AGC | GGC | TCG | TAC | AAC | TGG |
| Schizophyllum_commune       | GGC | GGC | GCA | ACA | TGC | TCT | GGC | GAT | GAC | DCT | TCC | ACC | GGC | CCC | TCG | TCC | SAC | TTC |
| Phanerochaete_chrysosporium | GGC | TGC | CCA | GCA | TGG | AAT | CCC | TCA | GTC | TCT | GGC | CCC | GGT | TCC | TCG | AAC | TAC | TCG |
| Fibroporia_radiculosa       | AGC | TGC | TCA | GCA | TGG | CAT | CCC | CCA | GTT | TTC | GCC | ACC | GGT | CCC | TCG | TAC | AAC | TGG |
| Omphalotus_olearius         | TGC | GGC | CCA | CTA | TGG | GAT | TCC | TCA | GTC | TCT | TCC | AAG | ACC | CCG | ACC | TAC | AAC | TAC |
| Stereum_hirsutum            | GGC | GGC | TCA | TCA | TGG | AAT | CCC | GCA | ATC | TTC | GCC | GGC | GGC | ACC | GGC | CAC | AAC | AGC |
| Coniophora_puteana          | GGC | GGC | CCA | TTA | TGG | CAT | CCC | TCA | GTC | TCT | GCC | TGG | GGC | ACC | TCG | TAC | TAC | CCC |
| Pleurotus_ostreatus         | GGC | AAA | TCA | TTA | TGG | CAT | CCC | GAC | BAT | TCT | CCC | ACC | GGC | ACC | GGC | TAC | TAC | ACC |
| Gloeophyllum_trabeum        | GGC | TAG | TCA | ATA | TGG | CAT | CCC | CCA | GCA | ATT | GCC | TCC | GGT | GGC | TCG | TAC | AAC | GGC |
| Fomitiporia_mediterranea    | GGC | GGC | ACA | CCA | TGG | ACT | CCC | TAC | TAA | GCT | CCC | GGC | TAT | TCC | CCG | TGT | SAA | GAG |
| Heterobasidion_annosum      | AGC | TGC | CCA | TCA | TGG | GAT | ACC | CCA | ACA | ACT | GCC | CCC | AGC | ACC | TCG | TAC | AAC | TCC |
| Phanerochaete_carnosa       | GGC | TGC | TCA | GCA | TGG | AAT | CCC | TCA | ATC | DCT | TCC | CCC | GGT | TCC | TCG | SAC | TAC | TGG |
| Laccaria_bicolor            | AGC | GGC | CCA | CTA | TGG | TAT | CCC | ACA | TAT | TCT | GCC | ACC | AGC | GGC | CCG | AAC | TGT | ACC |
| Postia_placenta             | AGC | TGC | TCA | TCA | TGG | CAT | CCC | CCA | GTT | TTC | GCC | CCC | TGT | ACC | TCG | AAC | AAC | TCG |
| Rhizoctonia_solani          | TCA | ATA | TGG | TAT | AAA | TAT | CCC | CAC | ACA | ACT | GCC | TCC | GGC | TCC | CCG | SAC | TAC | CTC |
| Antrodia_cinnanomea         | AGC | TGC | ACA | TCA | TGG | CAT | CCC | TCA | GTT | TTC | ACC | CCC | GGT | GGC | CCG | TAC | TAC | TGG |
| Punctularia_strigosozonata  | GGC | GGC | GCA | GCA | TGG | CAT | ACC | GCA | GTT | DCT | TCC | TCC | GGC | GGC | ACC | ATA | TCC |     |
| Trametes_versicolor         | AGC | TGC | TCA | TCA | TGG | AAT | CCC | CCA | GTC | GCT | TCC | ACC | GGT | ACC | TCG | AAC | AAC | CAG |
| Agaricus_bisporus           | AGC | GGC | TCA | TCA | TGG | CAT | TCC | GAC | AAC | ACT | TCC | ACC | ACT | GGC | CAA | AAT | AGC | ATC |
| Pinus_taeda_cont            | AGC | TGC | TCA | TCA | GGG | TAT | CCC | GAT | GTC | CTT | ACC | CCC | AAG | ACC | CCG | TAC | AGT | GAG |

13 synonymous  
270 non-synonymous

**Supplementary Figure 3. Regions upstream of mAUG show coding conservation in-frame with the**

**mORF.** (A) Conservation in the N-terminal extension of *N. crassa cpc-1*. Nucleotide and codon alignments of the region corresponding to uORF2 of *cpc-1* in *N. crassa* is shown in: (i) in-frame with the main ORF (frame 1 in Figure 1B); (ii) in frame with uORF2 (frame 3 in Figure 1B). (iii-v) A proline-rich region (residues 218-224, red dashed bracket in Figure 1K) upstream of the *cpc-1* mAUG shows high conservation in the mORF reading frame. Nucleotide and codon alignments of this region are shown for: (iii) frame 1 (in-frame with the mORF); (iv) frame 2; and (v) frame 3. In these alignments consensus codons (and gaps) are highlighted in white, synonymous codons in green, non-synonymous codons in brown and stop codons in magenta. Species identifiers of the sequences used are indicated on the left. The numbers of synonymous and non-synonymous substitutions are summed below each panel. The additional numbers in parentheses below panel “i” indicate the number of synonymous and non-synonymous substitutions in-frame with the mORF in the small patch of sequence marked a dashed orange bracket above the aligned sequences. This patch represents the conserved peptide region indicated by the corresponding dashed orange bracket in Figure 1K. The alignments were generated by a custom script that conceptually translated the main ORF frame into peptide sequence, then performed ClustalX alignment of peptide sequence, then converted this alignment back to nucleotides. The most common codon in each column was then designated as the consensus codon; synonymous and non-synonymous substitutions were determined relative to it. (C) The region corresponding to the beginning of uORF3 of *Coprinus cinerea cpc-1* is conserved at the amino acid level in-frame with the mORF in Agaricomycetes homologs. Nucleotide and codon alignments of the region including the beginning of uORF3 of *C. cinerea cpc-1* (indicated by red dashed lines in Supplementary Figure 5F) are shown for: (vi) frame 1 (in-frame with the main ORF); (vii) frame 2 (in-frame with uORF3); and (viii) frame 3. Species identifiers of the sequences used are indicated on the left. “Pinus\_taeda\_cont” indicates a sequence coming from an unknown Agaricomycetes species contaminating the *Pinus taeda* EST library. The numbers of synonymous and non-synonymous substitutions are indicated on the right of each panel. The position of the AUG start codon of uORF3 is indicated by an inverted red triangle. Coloring scheme, alignment generation and display are the same as in other panels.
