# Supplementary material for: Translation Initiation from Conserved Non-AUG Codons Provides Additional Layers of Regulation and Coding Capacity
Source: PubMed Central journal article supplement (PMC5487733; doi:10.1128/mbio.00844-17), 2017-06-27
Supplement: mbo003173356sf6.pdf [file mbo003173356sf6.pdf]

```

...AGATCGGATCC TTCCTTTCTCTTCTCTGCAACCAAATCCACCTATCAAACCAAACAGTAT1
      BamHI AC
2      3      uORF1
CACGAGAAGCATCCATCAAGATGCGTTAAATCGCTCCCATTTCCCGTTCTCTCGAACCCAAGTT
CACA      ACC      AAA
4      5
CGGTAATCGTCAACATTAAACAATTTTACGTTCCCCCTCTTCGTCAACCCCTTCAGCTCTTCCT
      ACC      TTT
6
TCACAGGTAGATCTGAACCTCAGCACCCAGCTTCGTAGCTCGCGCTCAAGTTCTCTTACCCCCAC
      BglIII CTC
7      8      uORF2
CGCCACCATTACGGCCAAGACTTTCCAGTCTTCACCACGGATTCCCAACAGTCAACATGGCTTC
      TTT      ACA      ACA
CCTCCAGTTCACCGAGCCTGCCGGCACTCTCCGCGCAATCACCAGCACAACAACAACAGCCACCA
CTTCAGGACTTTGTCTTGTTTCGATCAGCCGATCAGACCACACCGTCAACATAACCGCAACGCTCT
CCAGCCTCCAACCCGAGGTATCAACCTGAATCAGCAACATCGTAGCCAGCATTTGTCTCCGTCTC
TGCAGAACCAGCGAGTTGCAAACATTATCCAGGCAACAGGGCACCAACTCACTTCTTCGGCTTTC
ACCAATCGGTACAGCTCTTCTCAGAACTCGCGTCCGCAACAGTTCTACGCTTCCTCAGCACCTTC
TTCAGCTTCAATCCTGAACACTCAGAACCGCGCACAGCAGCGCCCTCCTGTTCCCTTGTTTCCCA
AAAGTACCGGTAGTATTTTCGCACGGAAAGCAGGGCAACAAGATGTTCACTCGAGTC...
      AgeI      TAA      CTC      XhoI

```

**Supplementary Figure 6. The sequences of *cpc1-luc* fusion constructs used for in vitro experiments.**

Mutations and selected unique restriction sites are shown below the sequence. uORF1, uORF2 and the beginning of the main ORF (mORF) are shaded gray. NCCs are shaded magenta and are numbered 1-8. The position of the introduced TAA mutation that terminates the translation from NCCs is indicated by a red box. Luciferase was placed in-frame with CPC1 at the *XhoI* site.
