# Supplementary material for: Translation Initiation from Conserved Non-AUG Codons Provides Additional Layers of Regulation and Coding Capacity
Source: PubMed Central journal article supplement (PMC5487733; doi:10.1128/mbio.00844-17), 2017-06-27
Supplement: mbo003173356sf7.pdf [file mbo003173356sf7.pdf]

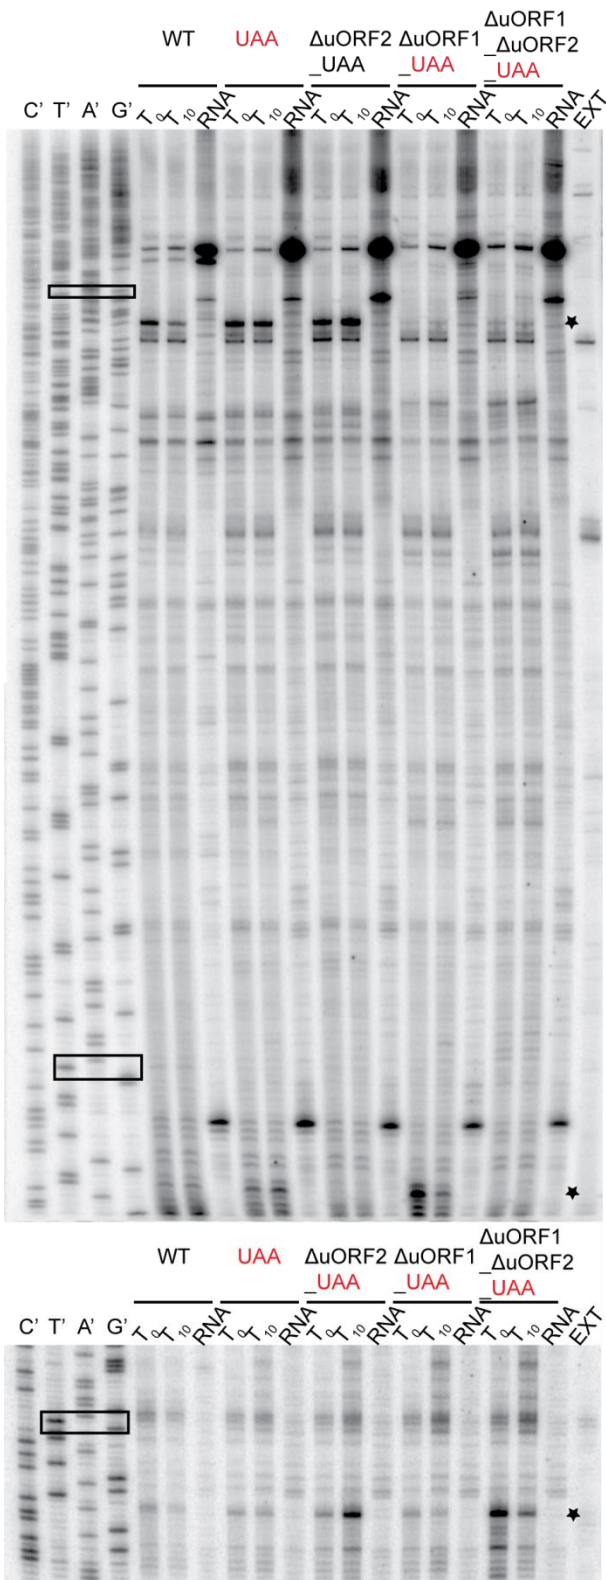

### Supplementary Figure 7. Toeprint analysis

indicates reinitiation following translation of *cpc-*

*1* uORF1 but not uORF2 (primary data for

Figure 2B). The description of the experiment is

given in the text. For markers, either primer CPC101

(upper panel) or ZW4 (lower panel) was used to

sequence the WT template (the four left-most lanes).

The nucleotide complementary to the

dideoxynucleotide added to each sequencing reaction

for the wild-type *cpc1-luc* template is indicated

above the corresponding lane so that the sequence of

the template can be directly deduced; the 5'-to-3'

sequence reads from top to bottom. Asterisks (top to

bottom): toeprint products corresponding to

ribosomes bound at uAUG1, uAUG2 and mAUG on

the *cpc1-luc* RNA. Boxes (top to bottom): uAUG1,

uAUG2 and mAUG in the sequence markers. The

ribosome protects approximately 16-nt 3' of a start

codon in the ribosome P-site.
